# Supplementary material
Source: PubMed Central journal article supplement (PMC3471419)
Supplement: supp_mes024_Supplementary-material.pdf [file supp_mes024_Supplementary-material.pdf]

*Supplemental Material for*

**Biomonitoring hexamethylene diisocyanate (HDI) exposure based on serum levels of HDI-specific IgG.** Adam V. Wisnewski\*, Meredith H. Stowe\*, Abby Nerlinger\*, Paul Opare-addo\*, David DeCamp<sup>†</sup>, Christopher R. Kleinsmith<sup>‡</sup>, and Carrie A. Redlich\*

| <u>TABLE OF CONTENTS</u>                                                                                                      | <u>Page #</u> |
|-------------------------------------------------------------------------------------------------------------------------------|---------------|
| Supplemental Table 1: Self-Reported PPE Use by Task.....                                                                      | 2             |
| Supplemental Table 2: HDI-IgG Titers of Individual Serum Samples.....                                                         | 3             |
| Supplemental Table 3: HDI-IgG Status of Workers.....                                                                          | 4             |
| Supplemental Table 4: HDI-IgG status and PPE Use (during painting) by<br>309 <sup>th</sup> MXW Aircraft Painters (N=39) ..... | 5             |

Supplemental Table 1: Self-Reported PPE Use by Task

| Task (N= # Workers) <sup>a</sup> | PPE Type                            | Total (%)  | 309 <sup>th</sup> MXW<br>N (%) | 388 <sup>th</sup> FW<br>N (%) |
|----------------------------------|-------------------------------------|------------|--------------------------------|-------------------------------|
|                                  |                                     |            | N=56                           | N=11                          |
| <b>Painting (N=67)</b>           | <b>Glove Type</b>                   |            |                                |                               |
|                                  | Nitrile                             | 37 (55.2)  | 28 (50.0)                      | 9 (81.1)                      |
|                                  | Latex                               | 15 (22.4)  | 13 (23.2)                      | 2 (18.1)                      |
|                                  | Other                               | 7 (10.4)   | 7 (12.5)                       | 0 (0.0)                       |
|                                  | None                                | 8 (11.9)   | 8 (14.3)                       | 0 (0.0)                       |
|                                  | <b>Respirator Type</b>              |            |                                |                               |
|                                  | Supplied Air <sup>b</sup>           | 61 (91.0)  | 50 (89.3)                      | 11 (100.0)                    |
|                                  | Cartridge <sup>c</sup>              | 3 (4.5)    | 3 (5.4)                        | 0 (0.0)                       |
|                                  | Unclear / None                      | 3 (4.5)    | 3 (5.4)                        | 0 (0.0)                       |
|                                  | <b>Head Covering</b>                |            |                                |                               |
| Hood                             | 51 (76.1)                           | 40 (71.4)  | 11 (100.0)                     |                               |
| None                             | 16 (23.9)                           | 16 (21.57) | 0 (0.0)                        |                               |
| <b>Taping (N=67)</b>             | <b>Glove Type</b>                   |            | N=53                           | N=14                          |
|                                  | Nitrile                             | 14 (20.9)  | 8 (15.1)                       | 6 (42.3)                      |
|                                  | Latex                               | 4 (6.0)    | 2 (3.8)                        | 2 (14.3)                      |
|                                  | Other                               | 3 (4.5)    | 3 (5.6)                        | 0 (0)                         |
|                                  | None                                | 46 (68.7)  | 40 (75.5)                      | 6 (42.9)                      |
|                                  | <b>Respirator Type</b>              |            |                                |                               |
|                                  | Supplied Air <sup>b</sup>           | 1 (1.5)    | 1 (1.9)                        | 0 (0)                         |
|                                  | Cartridge <sup>c</sup>              | 0 (0.0)    | 0 (0)                          | 0 (0)                         |
|                                  | Unclear / None                      | 66 (98.5)  | 52 (98.1)                      | 14 (100.0)                    |
|                                  | <b>Head Covering</b>                |            |                                |                               |
| Hood                             | 1 (1.5)                             | 1 (1.9)    | 0 (0.0)                        |                               |
| No Hood                          | 66 (98.5)                           | 52 (98.1)  | 14 (100.0)                     |                               |
| <b>Mixing Paint (N= 67)</b>      | <b>Glove Type</b>                   |            | N=56                           | N=11                          |
|                                  | Nitrile                             | 35 (52.2)  | 27 (48.2)                      | 8 (72.7)                      |
|                                  | Latex                               | 18 (26.9)  | 17 (30.4)                      | 1 (9.1)                       |
|                                  | Other                               | 4 (6.0)    | 4 (7.1)                        | 0 (0.0)                       |
|                                  | None                                | 10 (14.9)  | 8 (14.3)                       | 2 (18.2)                      |
|                                  | <b>Respirator Type</b> <sup>#</sup> |            |                                |                               |
|                                  | Supplied Air <sup>b</sup>           | 8 (11.9)   | 6 (10.7)                       | 2 (18.2)                      |
|                                  | Cartridge <sup>c</sup>              | 16 (23.9)  | 11 (19.6)                      | 5 (45.5)                      |
|                                  | Unclear / None                      | 43 (64.2)  | 39 (69.6)                      | 4 (36.4)                      |
|                                  | <b>Head Covering</b>                |            |                                |                               |
| Hood                             | 13 (19.4)                           | 7 (12.5)   | 6 (54.6)                       |                               |
| None                             | 54 (80.6)                           | 49 (87.5)  | 5 (45.5)                       |                               |
| <b>Sandblasting (N=25)</b>       | <b>Glove Type</b>                   |            | N=16                           | N=9                           |
|                                  | Nitrile                             | 15 (60.0)  | 10 (62.5)                      | 5 (55.6)                      |
|                                  | Latex                               | 2 (8.0)    | 0 (0.0)                        | 2 (22.2)                      |
|                                  | Other                               | 2 (8.0)    | 2 (12.5)                       | 0 (0.0)                       |
|                                  | None                                | 6 (24.0)   | 4 (25.0)                       | 2 (22.2)                      |
|                                  | <b>Respirator Type</b>              |            |                                |                               |
|                                  | Supplied Air <sup>b</sup>           | 18 (72.0)  | 11 (68.8)                      | 7 (77.8)                      |
|                                  | Cartridge <sup>c</sup>              | 1 (4.0)    | 0 (0.0)                        | 1 (11.1)                      |
|                                  | Unclear / None                      | 6 (24.0)   | 5 (31.3)                       | 1 (11.1)                      |
|                                  | <b>Head Covering</b>                |            |                                |                               |
| Hood                             | 12 (48.0)                           | 7 (43.8)   | 5 (55.6)                       |                               |
| None                             | 13 (52.0)                           | 9 (56.3)   | 4 (44.4)                       |                               |

<sup>a</sup>Some individuals reported wearing more than one type of PPE for the same task; <sup>b</sup>Supplied air respirator (+ cartridge); <sup>c</sup>Only a cartridge respirator. 388<sup>th</sup> FW Personnel are more likely to report wearing hood covering when painting ( $p<0.05$ )\*, nitrile gloves when taping ( $p<0.05$ )\*\* , and a respirator when mixing paint ( $p<0.01$ )<sup>#</sup>.

Supplemental Table 2: HDI-IgG Titers of Individual Serum Samples

| <b>ID#</b> | <b>HDI-IgG Titre</b> |
|------------|----------------------|
| 011        | 1:40                 |
| 015        | 1:40                 |
| 024        | 1:20                 |
| 027        | 1:40                 |
| 034        | 1:320                |
| 037        | 1:40                 |
| 039        | 1:80                 |
| 044        | 1:40                 |
| 045        | 1:80                 |
| 049        | 1:2,560              |
| 051        | 1:320                |
| 055        | 1:1,280              |
| 059        | 1:20                 |
| 060        | 1:40                 |
| 061        | 1:320                |
| 070        | 1:2,560              |
| 074        | 1:80                 |

Supplemental Table 3: HDI-IgG Status of Workers

|                                          | <b>HDI-IgG<br/>No. Elevated /<br/>Total in Group (%)</b> | <b>Titre<br/>Mean <math>\pm</math> SD</b> | <b>Range</b> |
|------------------------------------------|----------------------------------------------------------|-------------------------------------------|--------------|
| <b>Total workers</b>                     | 74 (100)                                                 | 107.3 $\pm$ 441.5                         | 1-2560       |
| <b>Gender</b>                            |                                                          |                                           |              |
| Male                                     | 16/66 (24.2)                                             | 118.9 $\pm$ 466.4                         | 1-2560       |
| Female                                   | 1/8 (12.5)                                               | 10.9 $\pm$ 27.9                           | 1-80         |
| <b>Organization</b>                      |                                                          |                                           |              |
| <b>309<sup>th</sup> MXW</b>              | 16/59 (27.1)                                             | 133.6 $\pm$ 491.8                         | 1-2560       |
| <i>Aircraft Painters</i>                 | 13/42 (30.8)                                             | 132.0 $\pm$ 545.2                         |              |
| C -130                                   | 6/21 (28.6)                                              | 205.5 $\pm$ 608.9                         | 1-2560       |
| F-16                                     | 6/18 (33.3)                                              | 52.7 $\pm$ 110.7                          | 1-320        |
| A-10                                     | 1/3 (33.3)                                               | 14.0 $\pm$ 22.5                           | 1-40         |
| <i>Other Painters</i>                    | 1/12 (8.3)                                               | 8.9 $\pm$ 22.1                            |              |
| Landing Gear                             | 1/4 (25.0)                                               | 20.8 $\pm$ 39.5                           | 1-80         |
| Generator                                | 0/8 (0)                                                  | 1 $\pm$ 0.0                               | 1            |
| <i>Miscellaneous Painters</i>            |                                                          |                                           |              |
| F-22, Missile and Parts                  | 0/3 (0)                                                  | 1 $\pm$ 0.0                               | 1            |
| <i>Miscellaneous Mechanics</i>           |                                                          |                                           |              |
| 75 ABW Vehicle & Maintenance             | 2/2 (100)                                                | 1300.0 $\pm$ 1781.9                       | 40-2560      |
| <b>388<sup>th</sup> FW (All workers)</b> | 1/15 (6.7)                                               | 3.6 $\pm$ 10.1                            | 1-40         |
| <b>Shift</b>                             |                                                          |                                           |              |
| Day or Swing                             | 14/69 (20.3)                                             | 54.7 $\pm$ 311.1                          | 1-2560       |
| Night (C-130)                            | 3/5 (60)                                                 | 832.4 $\pm$ 1098.9                        | 1-2560       |
| <b>Current Smoker</b>                    |                                                          |                                           |              |
| Yes                                      | 1/20 (5.0)                                               | 17.0 $\pm$ 71.3                           | 1-320        |
| No                                       | 16/54 (29.6)                                             | 140.7 $\pm$ 512.3                         | 1-2560       |

Supplemental Table 4: HDI-IgG status and PPE Use (during painting) by 309<sup>th</sup> MXW Aircraft

Painters (N=39)<sup>a</sup>

| <b>PPE Type</b>         | <b>HDI-IgG<br/>No. Elevated/Total Use PPE (%)</b> | <b>Titre<br/>Mean ± Std Dev</b> | <b>Range</b> |
|-------------------------|---------------------------------------------------|---------------------------------|--------------|
| <b>Glove Type*</b>      |                                                   |                                 |              |
| Nitrile                 | 7/19 (36.8)                                       | 246.9 ± 634.8                   | 1-2560       |
| Latex                   | 2/7 (28.6)                                        | 9.3 ± 15.3                      | 1-40         |
| Other                   | 2/6 (33.3)                                        | 60.7 ± 128.0                    | 1-320        |
| None                    | 1/7 (14.3)                                        | 3.7 ± 7.2                       | 1-20         |
| <b>Respirator Type*</b> |                                                   |                                 |              |
| Supplied Air Respirator | 9/34 (26.5)                                       | 103.1 ± 440.9                   | 1-2560       |
| Cartridge Respirator    | 2/2 (100.0)                                       | 800.0 ± 678.8                   | 1-1280       |
| Unknown / None          | 1/3 (33.3)                                        | 14.0 ± 22.5                     | 1-40         |
| <b>Head Covering*</b>   |                                                   |                                 |              |
| Hood                    | 7/28 (25.0)                                       | 145.8 ± 530.9                   | 1-2560       |
| No Hood                 | 5/11 (45.5)                                       | 96.9 ± 145.2                    | 1-320        |

<sup>a</sup>Data unavailable for 3 workers from the 573<sup>rd</sup> squadron, \*Differences between reported PPE use and HDI-IgG status for each PPE-type were not statistical significant ( $p > 0.05$ ).
